# Supplementary material for: Parental anxiety related to referral of childhood heart murmur; an observational/interventional study
Source: PubMed Central journal article supplement (PMC4654835; doi:10.1186/s12887-015-0507-4), 2015-11-21
Supplement: 12887_2015_507_MOESM3_ESM.pdf [file 12887_2015_507_MOESM3_ESM.pdf]

### Additional file 3

Comparison of characteristics between responders (n=90) and non-responders (n=168) of the second STAI Sheet

|                                            | <b>Responder<br/>n=90</b> | <b>Non responder<br/>n=168</b> |
|--------------------------------------------|---------------------------|--------------------------------|
| Gender (female)                            | 59 (66%)                  | 97 (58%)                       |
| Both parents live with child               | 81 (90%)                  | 146 (87%)                      |
| Education level over 12 years              | 55 (61%)                  | 93 (55%)                       |
| Has more than one child                    | 68 (76%)                  | 124 (74%)                      |
| Family history HD                          | 22 (24%)                  | 42 (25%)                       |
| Family history HM                          | 22 (24%)                  | 42 (25%)                       |
| Looked up info on HM                       | 45 (50%)                  | 68 (41%)                       |
| <b>Children<br/>n=62</b>                   | <b>n=62</b>               | <b>n=116</b>                   |
| Gender (female)                            | 36 (58%)                  | 56 (48%)                       |
| Age (years, mean±SD)                       | 3.73 ± 3.5                | 3.38 ± 2.7                     |
| Only child                                 | 13 (21%)                  | 23 (20%)                       |
| First born                                 | 29 (47%)                  | 40 (35%)                       |
| Both parents accompany the child           | 29 (47%)                  | 62 (53%)                       |
| Previous hospitalisation                   | 17 (27%)                  | 38 (33%)                       |
| Diagnosed with CHD                         | 4 (6.5%)                  | 10 (8.6%)                      |
| <b>General info<br/>n=90</b>               | <b>n=90</b>               | <b>n=168</b>                   |
| Wait time (months, mean±SD)                | 2.43 ± 1.1                | 2.54 ± 0.9                     |
| Referred by a specialist                   | 12 (13%)                  | 28 (17%)                       |
| Received informational sheet               | 27 (30%)                  | 43 (26%)                       |
| <b>STAI</b>                                |                           |                                |
| STAI state (mean±SD)                       | 34.9±9.6                  | 34.6±9.8                       |
| STAI trait (mean±SD)                       | 37.3±8.5                  | 37.8±9.6                       |
| <b>Concern</b>                             |                           |                                |
| Has a major concern                        | 65 (72%)                  | 117 (70%)                      |
| Serious to have a physiologic HM           | 56 (62%)                  | 91 (54%)                       |
| Childs activity will be restricted of HM   | 22 (24%)                  | 44 (26%)                       |
| Child increased risk of HD later           | 44 (49%)                  | 85 (51%)                       |
| Most likely cause to HM in children is CHD | 34 (38%)                  | 53 (32%)                       |

Abbreviations HM: heart murmur, HD: heart disease, CHD: congenital heart disease
