# Supplementary material for: Parental anxiety related to referral of childhood heart murmur; an observational/interventional study
Source: PubMed Central journal article supplement (PMC4654835; doi:10.1186/s12887-015-0507-4), 2015-11-21
Supplement: 12887_2015_507_MOESM4_ESM.pdf [file 12887_2015_507_MOESM4_ESM.pdf]

**Additional file 4**

*Comparison of characteristics between Control group (did not receive a fact sheet) and Intervention group (received a fact sheet)*

|                                            | <b>Control group<br/>n=188</b> | <b>Intervention<br/>group n=70</b> |
|--------------------------------------------|--------------------------------|------------------------------------|
| Gender (female)                            | 109 (58%)                      | 47 (67%)                           |
| Both parents live with child               | 164 (87%)                      | 63 (90%)                           |
| Education level over 12 years              | 102 (54%)                      | 46 (66%)                           |
| Has more than one child                    | 144 (77%)                      | 48 (69%)                           |
| Family history HD                          | 52 (28%)                       | 12 (17%)                           |
| Family history HM                          | 46 (25%)                       | 18 (26%)                           |
| Looked up info on HM                       | 79 (42%)                       | 34 (49%)                           |
| <b>Children</b>                            | <b>n=129</b>                   | <b>n=49</b>                        |
| Gender (female)                            | 68 (53%)                       | 24 (49%)                           |
| Age (years, mean±SD)                       | 3.82 ± 3.3                     | 2.66 ±1.9                          |
| Only child                                 | 24 (19%)                       | 12 (25%)                           |
| First born                                 | 47 (36%)                       | 22 (45%)                           |
| Both parents accompany the child           | 64 (50%)                       | 27 (55%)                           |
| Previous hospitalisation                   | 38 (30%)                       | 17 (35%)                           |
| Diagnosed with CHD                         | 12 (9%)                        | 2 (4%)                             |
| <b>General info</b>                        | <b>n=188</b>                   | <b>n=70</b>                        |
| Wait time (months, mean±SD)                | 2.57 ± 1.0                     | 2.33 ± 0.9                         |
| Referred by a specialist                   | 31 (17%)                       | 9 (13%)                            |
| Received informational sheet               | 63 (34%)                       | 27 (39%)                           |
| <b>STAI</b>                                |                                |                                    |
| STAI state (mean±SD)                       | 35.3±9.8                       | 33.2±9.2                           |
| STAI trait (mean±SD)                       | 38.2±9.4                       | 36.0±8.6                           |
| <b>Concern</b>                             |                                |                                    |
| Has a major concern                        | 137 (73%)                      | 45 (64%)                           |
| Serious to have a physiologic HM           | 111 (59%)                      | 36 (51%)                           |
| Childs activity will be restricted of HM   | 48 (26%)                       | 18 (26%)                           |
| Child increased risk of HD later           | 101 (54%)                      | 28 (40%)                           |
| Most likely cause to HM in children is CHD | 71 (38%)                       | 16 (23%)                           |

*Abbreviations HM: heart murmur, HD: heart disease, CHD: congenital heart disease*
