# Supplementary material for: Parental anxiety related to referral of childhood heart murmur; an observational/interventional study
Source: Springer Nature journal article supplement (doi:10.1186/s12887-015-0507-4), 2015-11-21

## Translated Questionnaire

### **On parent:**

1) Mother       Father       Other \_\_\_\_\_

2) Both parents live with the child

Sole parental care

Shared parental care

3) *Highest level of education:*

Elementary school

High school

University/college 1-4 years

University/college over 4 years

4) *Heart disease present in close family* (Your self, parents, siblings, partner)      Yes       No

5) *Heart murmur present in close family?* (Your self, parents, child's siblings, partner):      Yes       No

If yes, who: \_\_\_\_\_

### **On child:**

6) *Birth order:*

No \_\_\_\_\_ of total number of siblings: \_\_\_\_\_

### **General questions:**

7) *Have you sought information on heart murmurs?*      Yes       No

8) *If yes, where did you seek information?*

Internet

Friends and acquaintances

Your parents/grand parents

Newspapers

Encyclopaedias

9) *To what degree were you relieved by the information?*

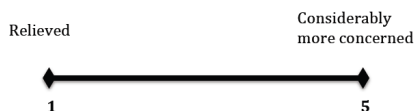

10) *What impact do you believe the heart murmur will have on your child's physical activity?*

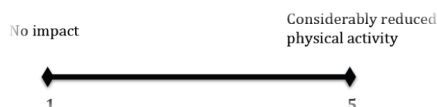

11) *How serious is it to have a physiological heart murmur?*

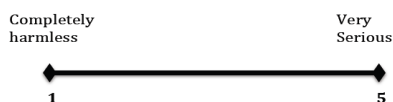

12) *What do you believe is the most common cause of heart murmur in children?*

Valvular problem

Congenital heart disease

Heart attack

Natural phenomenon

13) *To what degree do you believe your child has increased risk of heart disease later in life?*

No risk

High risk

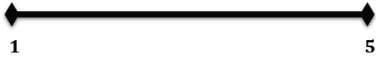

Supplement: MOESM2 [file 12887_2015_507_MOESM2_ESM.pdf]
